# Supplementary material
Source: PubMed Central journal article supplement (PMC3290710)
Supplement: NIHMS335444-supplement-1.pdf [file NIHMS335444-supplement-1.pdf]

Supplemental Table A

*Psychotropic Medication Usage by Medication Type for Males, Females and the Total Sample*

| Medication Type                    | Gender |         | Total |
|------------------------------------|--------|---------|-------|
|                                    | Males  | Females |       |
| Psychotropic Medication            | 39.8%  | 46.4%   | 44.8% |
| SSRI/SNRI                          | 20.1%  | 22.2%   | 20.1% |
| Anti-psychotics                    | 12.5%  | 6.4%    | 10.8% |
| Stimulants/ADHD Medications        | 29.8%  | 24.0%   | 28.2% |
| Anti-convulsants                   | 2.3%   | 8.5%    | 6.8%  |
| Sedatives                          | 1.1%   | 0.6%    | 1.0%  |
| Other Anti-depressants/<br>anxiety | 3.7%   | 1.8%    | 3.2%  |

Supplemental Table B

*Factor Loadings and Inter-Factor Correlations for the Six-factor Solution with Parcels Using*

*Data from the Derivation Sample*

| Parcel/ Items <sup>a</sup>                | Factor Loadings          |                            |                                                       |                                  |                        |                                            |
|-------------------------------------------|--------------------------|----------------------------|-------------------------------------------------------|----------------------------------|------------------------|--------------------------------------------|
|                                           | <u>I</u><br>Irritability | <u>II</u><br>Hyperactivity | <u>III</u><br>Socially<br>Unresponsive<br>/ Lethargic | <u>IV</u><br>Social<br>Avoidance | <u>V</u><br>Stereotypy | <u>VI</u><br>Inapp.<br>Speech <sup>b</sup> |
| Irritability 01                           | <b>.81</b>               | -.01                       | -.11                                                  | .01                              | .10                    | -.05                                       |
| Irritability 02                           | <b>.81</b>               | -.06                       | -.04                                                  | .04                              | .09                    | -.04                                       |
| Irritability 03                           | <b>.80</b>               | -.01                       | -.04                                                  | .00                              | .03                    | -.07                                       |
| 18. Disobedient, difficult to control     | <b>.67</b>               | .18                        | .11                                                   | -.05                             | -.06                   | -.04                                       |
| 24. Uncooperative                         | <b>.56</b>               | .12                        | .26                                                   | .01                              | -.16                   | .00                                        |
| 34. Cries over minor annoyances/hurts     | <b>.60</b>               | -.17                       | .27                                                   | -.07                             | -.08                   | .05                                        |
| 7. Boisterous, inappropriately noisy      | <b>.44</b>               | .30                        | -.05                                                  | .01                              | -.02                   | .17                                        |
| 21. Disturbs others                       | <b>.49</b>               | .18                        | -.12                                                  | -.01                             | .08                    | .19                                        |
| Hyperactivity 01                          | -.06                     | <b>1.00</b>                | -.03                                                  | .05                              | .02                    | -.04                                       |
| Hyperactivity 02                          | .04                      | <b>.88</b>                 | -.02                                                  | .03                              | .01                    | .00                                        |
| Hyperactivity 03                          | .05                      | <b>.91</b>                 | -.03                                                  | .01                              | .04                    | -.01                                       |
| 28. Doesn't pay attention to instruction  | -.20                     | <b>.57</b>                 | .54                                                   | -.02                             | -.04                   | -.03                                       |
| 31. Disrupts group activities             | .32                      | <b>.51</b>                 | -.02                                                  | -.01                             | .00                    | .00                                        |
| Lethargy 01                               | -.06                     | -.03                       | <b>.77</b>                                            | .13                              | .16                    | -.06                                       |
| Lethargy 02                               | -.15                     | -.13                       | <b>.78</b>                                            | .08                              | .18                    | -.08                                       |
| Lethargy 03                               | .07                      | -.10                       | <b>.75</b>                                            | .11                              | .06                    | .02                                        |
| 51. Pays no attention when spoken to      | -.13                     | .17                        | <b>.77</b>                                            | -.11                             | .00                    | .03                                        |
| 56. Deliberately ignores directions       | .18                      | .05                        | <b>.74</b>                                            | -.13                             | -.14                   | .02                                        |
| 25. Depressed mood                        | .45                      | -.43                       | <b>.49</b>                                            | .11                              | -.22                   | .04                                        |
| 42. Prefers to be alone                   | .04                      | -.01                       | .01                                                   | <b>.84</b>                       | -.04                   | -.03                                       |
| 16. Withdrawn/prefer solitary activities  | -.05                     | .01                        | -.02                                                  | <b>.87</b>                       | .00                    | .07                                        |
| 5. Seeks isolation from others            | .04                      | .02                        | .02                                                   | <b>.91</b>                       | -.08                   | .05                                        |
| 30. Isolates self from children or adults | -.01                     | .12                        | .09                                                   | <b>.82</b>                       | .04                    | -.08                                       |
| Stereotypy 01                             | .15                      | .03                        | .02                                                   | -.01                             | <b>.82</b>             | -.10                                       |
| Stereotypy 02                             | .01                      | .05                        | .10                                                   | -.07                             | <b>.76</b>             | .02                                        |
| Stereotypy 03                             | .13                      | -.01                       | .14                                                   | .01                              | <b>.71</b>             | .07                                        |
| Inappropriate Speech 01                   | -.04                     | .13                        | -.05                                                  | .03                              | .14                    | <b>.85</b>                                 |
| Inappropriate Speech 02                   | -.12                     | .00                        | -.07                                                  | .01                              | -.03                   | <b>.96</b>                                 |
| Inter-factor Correlation Matrix           |                          |                            |                                                       |                                  |                        |                                            |
| Factor I                                  | 1                        | .68                        | .69                                                   | .22                              | .38                    | .61                                        |
| Factor II                                 | .68                      | 1                          | .52                                                   | .06                              | .47                    | .56                                        |
| Factor III                                | .69                      | .52                        | 1                                                     | .48                              | .44                    | .48                                        |
| Factor IV                                 | .22                      | .06                        | .48                                                   | 1                                | .32                    | .23                                        |
| Factor V                                  | .38                      | .47                        | .44                                                   | .32                              | 1                      | .37                                        |
| Factor VI                                 | .61                      | .56                        | .48                                                   | .23                              | .37                    | 1                                          |

---

*Note.* Items in bold print load on the same respective factor as their original subscale and bolded/underlined items shifted to a new factor.

<sup>a</sup> Summary of items original phrasing.

<sup>b</sup> Abbreviation for Inappropriate Speech

Supplemental Table C

*Percent of Parents/Caregivers who Endorse Each Item, by Gender and Age of Individuals with*

*FXS*

| Age                                           | All  | Males | Females | Males |      |       |       |      | Females |      |       |       |      |
|-----------------------------------------------|------|-------|---------|-------|------|-------|-------|------|---------|------|-------|-------|------|
|                                               | 3-25 | 3-25  | 3-25    | 3-6   | 7-10 | 11-14 | 15-18 | 19+  | 3-6     | 7-10 | 11-14 | 15-18 | 19+  |
| <i>n</i>                                      | 630  | 459   | 171     | 109   | 128  | 111   | 62    | 49   | 25      | 55   | 41    | 33    | 17   |
| 44. Easily distractible                       | 82.2 | 89.5  | 62.6    | 88.1  | 96.1 | 89.2  | 85.5  | 81.6 | 56.0    | 69.1 | 58.5  | 63.6  | 58.8 |
| 13. Impulsive (acts without thinking)         | 74.9 | 81.9  | 56.1    | 80.6  | 89.8 | 79.3  | 74.2  | 79.6 | 60.0    | 60.0 | 61.0  | 45.5  | 47.1 |
| 15. Restless, unable to sit still             | 70.7 | 80.3  | 44.7    | 90.7  | 87.5 | 80.2  | 71.0  | 51.0 | 60.0    | 49.1 | 52.5  | 30.3  | 17.6 |
| 28. Doesn't pay attention instruction         | 68.7 | 75.6  | 50.3    | 76.1  | 82.8 | 75.7  | 72.6  | 59.2 | 56.0    | 52.7 | 65.9  | 33.3  | 29.4 |
| 22. Repetitive speech                         | 65.4 | 75.2  | 39.2    | 57.4  | 82.7 | 78.2  | 80.6  | 81.6 | 56.0    | 43.6 | 39.0  | 27.3  | 23.5 |
| 57. Has outbursts when doesn't get way        | 65.2 | 70.4  | 51.5    | 79.8  | 78.9 | 67.6  | 58.1  | 49.0 | 72.0    | 60.0 | 51.2  | 30.3  | 35.3 |
| 10. Temper tantrums/outbursts                 | 64.0 | 68.5  | 51.8    | 73.4  | 77.0 | 64.0  | 62.9  | 53.1 | 56.0    | 63.6 | 51.2  | 31.3  | 47.1 |
| 38. Doesn't stay in seat (lesson, meals...)   | 60.4 | 70.5  | 33.5    | 87.9  | 80.5 | 68.5  | 50.0  | 36.7 | 50.0    | 45.5 | 31.7  | 18.2  | 5.9  |
| 46. Repeats a word or phrase over and over    | 60.4 | 71.5  | 31.0    | 57.4  | 78.7 | 76.4  | 72.6  | 71.4 | 40.0    | 32.7 | 39.0  | 24.2  | 5.9  |
| 21. Disturbs others                           | 59.5 | 67.4  | 38.2    | 65.1  | 78.1 | 69.1  | 67.2  | 40.8 | 36.0    | 47.3 | 43.9  | 28.1  | 17.6 |
| 1. Excessively active at home/ school, work   | 58.5 | 67.9  | 33.3    | 81.7  | 80.2 | 64.5  | 55.7  | 28.6 | 56.0    | 47.3 | 34.1  | 9.1   | 0.0  |
| 36. Mood changes quickly                      | 58.1 | 58.2  | 57.9    | 56.5  | 61.7 | 63.1  | 49.2  | 53.1 | 68.0    | 69.1 | 48.8  | 48.5  | 47.1 |
| 29. Demands must be met immediately           | 57.2 | 62.4  | 43.3    | 70.6  | 68.5 | 66.7  | 46.8  | 38.8 | 56.0    | 56.4 | 36.6  | 30.3  | 23.5 |
| 9. Talks excessively                          | 56.3 | 59.6  | 47.4    | 41.3  | 64.0 | 64.0  | 75.8  | 59.2 | 44.0    | 60.0 | 51.2  | 36.4  | 23.5 |
| 14. Irritable and whiny                       | 55.6 | 57.4  | 50.9    | 62.4  | 72.7 | 53.6  | 40.3  | 36.7 | 40.0    | 67.3 | 56.1  | 30.3  | 41.2 |
| 39. Will not sit still for any length of time | 54.5 | 64.8  | 26.9    | 76.1  | 74.2 | 62.7  | 46.8  | 42.9 | 52.0    | 32.7 | 22.0  | 15.2  | 5.9  |
| 18. Disobedient; difficult to control         | 54.2 | 61.4  | 35.1    | 68.8  | 69.3 | 60.4  | 54.8  | 34.7 | 44.0    | 40.0 | 39.0  | 21.2  | 23.5 |
| 7. Boisterous                                 | 53.2 | 60.0  | 34.7    | 66.7  | 71.9 | 56.8  | 53.2  | 30.6 | 28.0    | 45.5 | 32.5  | 33.3  | 17.6 |
| 11. Stereotyped behavior                      | 52.8 | 61.3  | 30.0    | 55.0  | 69.5 | 62.7  | 55.7  | 57.1 | 28.0    | 37.0 | 34.1  | 24.2  | 11.8 |
| 24. Uncooperative                             | 52.4 | 58.9  | 35.1    | 58.3  | 68.5 | 58.6  | 50.0  | 46.9 | 48.0    | 43.6 | 31.7  | 24.2  | 17.6 |

|                                            |      |      |      |      |      |      |      |      |      |      |      |      |      |
|--------------------------------------------|------|------|------|------|------|------|------|------|------|------|------|------|------|
| 31. Disrupts group activities              | 52.2 | 61.9 | 26.3 | 63.3 | 73.4 | 64.0 | 56.5 | 30.6 | 28.0 | 36.4 | 26.8 | 18.2 | 5.9  |
| 54. Tends to be excessively active         | 52.1 | 62.4 | 24.6 | 78.7 | 74.2 | 56.8 | 51.6 | 22.4 | 40.0 | 29.1 | 29.3 | 12.1 | 0.0  |
| 35. Repetitive hand/body/ head movement    | 50.0 | 58.6 | 26.9 | 56.9 | 68.5 | 56.8 | 50.8 | 51.0 | 16.0 | 36.4 | 24.4 | 27.3 | 17.6 |
| 6. Meaningless, recurring movements        | 49.2 | 58.3 | 24.7 | 54.6 | 67.2 | 59.5 | 53.2 | 46.9 | 24.0 | 37.0 | 22.0 | 15.2 | 11.8 |
| 4. Aggressive to other children/adults     | 49.0 | 55.8 | 31.0 | 60.6 | 60.9 | 55.9 | 50.0 | 38.8 | 32.0 | 34.5 | 36.6 | 24.2 | 17.6 |
| 16. Withdrawn; prefer solitary activity    | 47.9 | 51.1 | 39.2 | 33.9 | 52.8 | 51.4 | 54.8 | 79.6 | 36.0 | 32.7 | 51.2 | 42.4 | 29.4 |
| 5. Seeks isolation from others             | 47.8 | 51.2 | 38.6 | 31.2 | 50.8 | 55.9 | 61.3 | 73.5 | 24.0 | 30.9 | 56.1 | 42.4 | 35.3 |
| 19. Yells at inappropriate times           | 44.8 | 50.0 | 31.0 | 52.8 | 59.4 | 46.8 | 40.3 | 38.8 | 28.0 | 34.5 | 36.6 | 21.2 | 29.4 |
| 40. Is difficult to reach / get through to | 44.5 | 48.9 | 32.7 | 50.0 | 53.9 | 46.8 | 48.4 | 38.8 | 40.0 | 36.4 | 34.1 | 27.3 | 17.6 |
| 56. Deliberately ignores directions        | 44.4 | 49.6 | 30.4 | 50.9 | 58.6 | 49.5 | 40.3 | 34.7 | 32.0 | 36.4 | 29.3 | 24.2 | 23.5 |
| 51. Pays no attention when spoken to       | 44.0 | 49.7 | 28.7 | 53.2 | 50.8 | 57.7 | 41.9 | 30.6 | 24.0 | 32.7 | 34.1 | 27.3 | 11.8 |
| 45. Waves/shakes extremities repeatedly    | 43.9 | 53.4 | 18.2 | 60.6 | 58.6 | 46.8 | 43.5 | 51.0 | 20.0 | 25.5 | 17.5 | 6.1  | 17.6 |
| 17. Odd, bizarre in behavior               | 43.8 | 49.7 | 28.1 | 45.0 | 55.9 | 47.3 | 46.8 | 53.1 | 28.0 | 30.9 | 29.3 | 21.2 | 29.4 |
| 42. Prefers to be alone                    | 43.7 | 46.4 | 36.3 | 27.5 | 46.1 | 50.5 | 48.4 | 77.6 | 12.0 | 36.4 | 43.9 | 45.5 | 35.3 |
| 30. Isolates himself/herself from others   | 42.1 | 45.5 | 32.9 | 39.4 | 43.0 | 41.4 | 50.0 | 69.4 | 28.0 | 27.8 | 36.6 | 39.4 | 35.3 |
| 47. Stamps feet/ bang objects/slam doors   | 41.3 | 45.3 | 30.4 | 39.4 | 55.5 | 44.1 | 43.5 | 36.7 | 36.0 | 36.4 | 31.7 | 21.2 | 17.6 |
| 8. Screams inappropriately                 | 41.0 | 46.3 | 26.9 | 53.2 | 60.2 | 41.8 | 35.5 | 18.4 | 20.0 | 40.0 | 26.8 | 15.2 | 17.6 |
| 33. Talks to self loudly                   | 40.0 | 45.3 | 25.7 | 33.0 | 48.8 | 42.3 | 60.7 | 51.0 | 24.0 | 30.9 | 24.4 | 21.2 | 23.5 |
| 34. Cries over minor annoyances and hurts  | 40.0 | 38.5 | 43.9 | 46.8 | 48.4 | 36.4 | 27.9 | 12.2 | 48.0 | 58.2 | 41.5 | 27.3 | 29.4 |
| 58. Shows few social reactions to others   | 38.7 | 40.6 | 33.5 | 36.7 | 47.2 | 40.5 | 35.5 | 38.8 | 33.3 | 34.5 | 36.6 | 30.3 | 29.4 |
| 12. Preoccupied; stares into space         | 36.0 | 37.3 | 32.7 | 36.7 | 43.0 | 39.6 | 29.0 | 28.6 | 28.0 | 36.4 | 31.7 | 36.4 | 23.5 |
| 41. Cries/screams inappropriately          | 35.6 | 39.0 | 26.3 | 49.5 | 48.4 | 38.7 | 21.0 | 14.3 | 40.0 | 34.5 | 24.4 | 12.1 | 11.8 |
| 48. Constantly runs or jumps around        | 34.8 | 42.3 | 14.6 | 67.9 | 53.2 | 30.9 | 22.6 | 8.2  | 32.0 | 20.0 | 12.2 | 3.0  | 0.0  |
| 26. Resists any form of physical contact   | 29.7 | 32.7 | 21.6 | 21.1 | 33.6 | 32.4 | 40.3 | 46.9 | 12.0 | 20.0 | 26.8 | 27.3 | 17.6 |
| 3. Listless, sluggish, in active           | 25.6 | 25.8 | 25.1 | 15.6 | 18.1 | 33.3 | 27.4 | 49.0 | 8.0  | 16.4 | 31.7 | 36.4 | 41.2 |

|                                               |      |      |      |      |      |      |      |      |      |      |      |      |      |
|-----------------------------------------------|------|------|------|------|------|------|------|------|------|------|------|------|------|
| 37. Unresponsive to structured activities     | 25.4 | 30.3 | 12.3 | 29.6 | 35.2 | 28.8 | 29.0 | 24.5 | 4.0  | 16.4 | 12.2 | 12.1 | 11.8 |
| 55. Responds negatively to affection          | 25.0 | 25.5 | 23.5 | 18.3 | 32.0 | 21.6 | 24.2 | 34.7 | 8.3  | 23.6 | 22.0 | 33.3 | 29.4 |
| 2. Injures self on purpose                    | 21.7 | 25.3 | 12.3 | 25.7 | 28.9 | 25.2 | 19.4 | 22.4 | 16.0 | 16.4 | 9.8  | 12.1 | 0.0  |
| 23. Does nothing but sit and watch others     | 21.1 | 22.7 | 17.0 | 14.7 | 20.3 | 23.4 | 31.1 | 34.7 | 16.0 | 12.7 | 17.1 | 24.2 | 17.6 |
| 49. Rocks body back and forth repeatedly      | 21.0 | 25.9 | 7.6  | 19.3 | 31.3 | 25.2 | 22.6 | 32.7 | 4.0  | 9.1  | 9.8  | 9.1  | 0.0  |
| 25. Depressed mood                            | 20.7 | 16.4 | 32.2 | 14.7 | 14.8 | 14.5 | 19.4 | 24.5 | 16.0 | 34.5 | 34.1 | 36.4 | 35.3 |
| 50. Deliberately hurts himself/herself        | 19.7 | 22.9 | 11.2 | 19.3 | 23.4 | 26.1 | 17.7 | 28.6 | 16.0 | 12.7 | 12.5 | 9.1  | 0.0  |
| 52. Does physical violence to self            | 16.3 | 19.0 | 9.4  | 20.2 | 19.5 | 18.9 | 14.5 | 20.4 | 12.0 | 12.7 | 7.3  | 6.1  | 5.9  |
| 43. Does not try to communicate               | 16.2 | 19.6 | 7.0  | 28.4 | 21.1 | 12.6 | 17.7 | 14.3 | 12.0 | 5.5  | 4.9  | 9.1  | 5.9  |
| 20. Fixed facial expression                   | 15.4 | 15.5 | 15.3 | 12.8 | 18.9 | 12.6 | 14.5 | 20.4 | 16.0 | 11.1 | 14.6 | 21.2 | 17.6 |
| 32. Sits/stands in one position for long time | 11.6 | 13.3 | 7.1  | 8.3  | 10.9 | 16.2 | 17.7 | 18.4 | 4.0  | 1.8  | 9.8  | 12.5 | 11.8 |
| 53. Inactive, never moves spontaneously       | 9.0  | 10.0 | 6.4  | 8.3  | 6.3  | 12.6 | 11.3 | 16.3 | 4.0  | 3.6  | 9.8  | 6.1  | 11.8 |
| 27. Moves or rolls head back and forth        | 8.9  | 10.5 | 4.7  | 11.0 | 13.3 | 7.2  | 8.1  | 12.2 | 0.0  | 3.6  | 9.8  | 3.0  | 5.9  |

Legend:

New Subscales  
(Text colors)

Irritability

Hyperactivity

Lethargy

Social  
Avoidance

Stereotypy

Inappropriate  
Speech

Most / least often endorsed  
(Cell colors)

Top 10 items  
endorsed

Least endorsed 10  
items
